# Supplementary material for: Genomic and phenotypic analyses of six offspring of a genome-edited hornless bull
Source: PubMed Central journal article supplement (PMC7007412; doi:10.1038/s41587-019-0266-0), 2019-10-07
Supplement: 41587_2019_266_MOESM1_ESM.pdf [file 41587_2019_266_MOESM1_ESM.pdf]

In the format provided by the authors and unedited.

# Genomic and phenotypic analyses of six offspring of a genome-edited hornless bull

Amy E. Young <sup>1</sup>, Tamer A. Mansour <sup>2,3</sup>, Bret R. McNabb <sup>3</sup>, Joseph R. Owen <sup>1</sup>,  
Josephine F. Trott <sup>1</sup>, C. Titus Brown <sup>3</sup> and Alison L. Van Eenennaam <sup>1\*</sup>

---

<sup>1</sup>Department of Animal Science, University of California, Davis, CA, USA. <sup>2</sup>Department of Clinical Pathology, School of Medicine, University of Mansoura, Mansoura, Egypt. <sup>3</sup>Department of Population Health and Reproduction, School of Veterinary Medicine, University of California, Davis, CA, USA.

\*e-mail: [alvaneennaam@ucdavis.edu](mailto:alvaneennaam@ucdavis.edu)

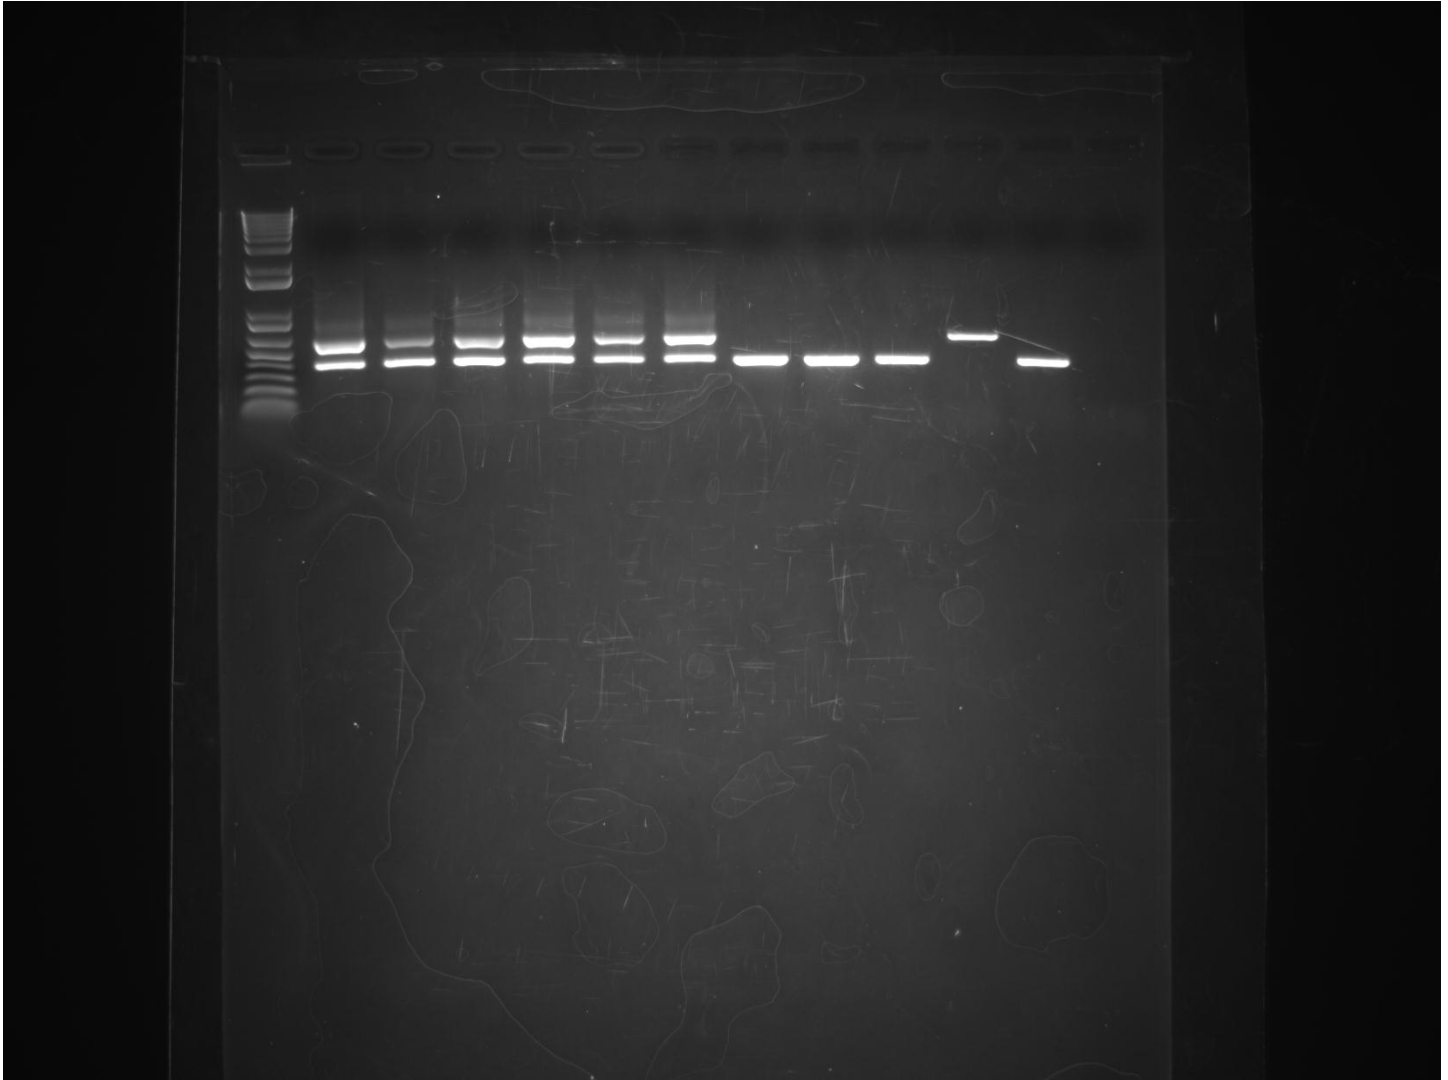

**Supplementary Figure 1**

Original scan of the PCR results depicted in Figure 3.

PCR products are shown for the genotyping of the polled locus for offspring of the genome-edited bull (first 6 lanes) and the Horned Hereford control offspring (next three lanes), with homozygous polled ( $P_C P_C$ ; 591 bp), homozygous horned ( $pp$ ; 389 bp), and negative PCR controls in the last 3 lanes. The molecular weight marker is in the far left lane.

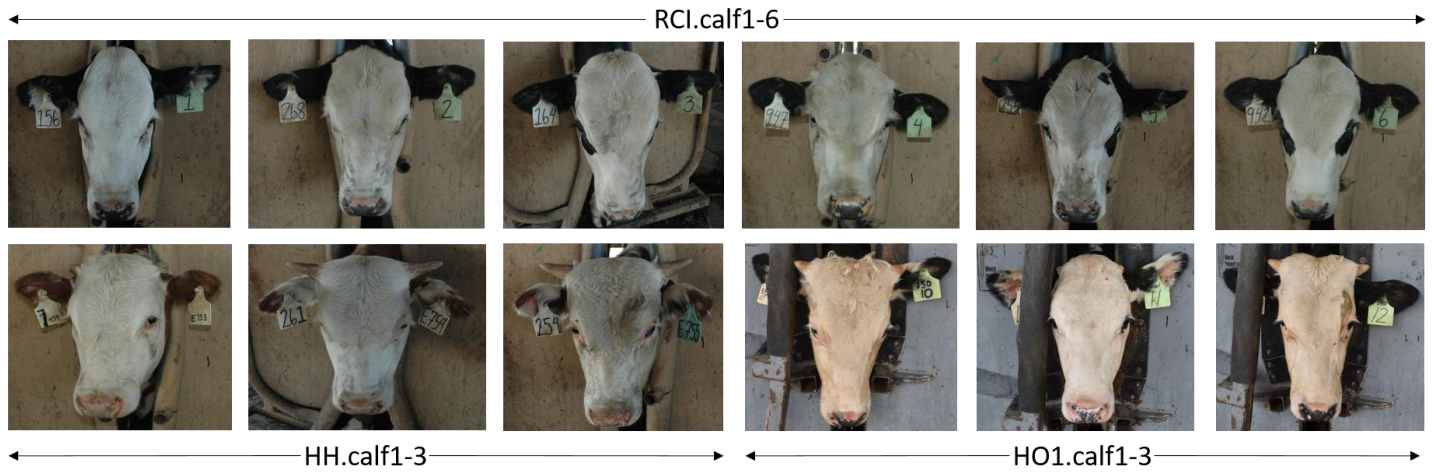

### Supplementary Figure 2

Calves in this study at 8 months of age.

RCI.calf1-6 (top row) did not develop horns, whereas HH.calves1-3 and HO1.calves1-3 (bottom row) did develop horns.

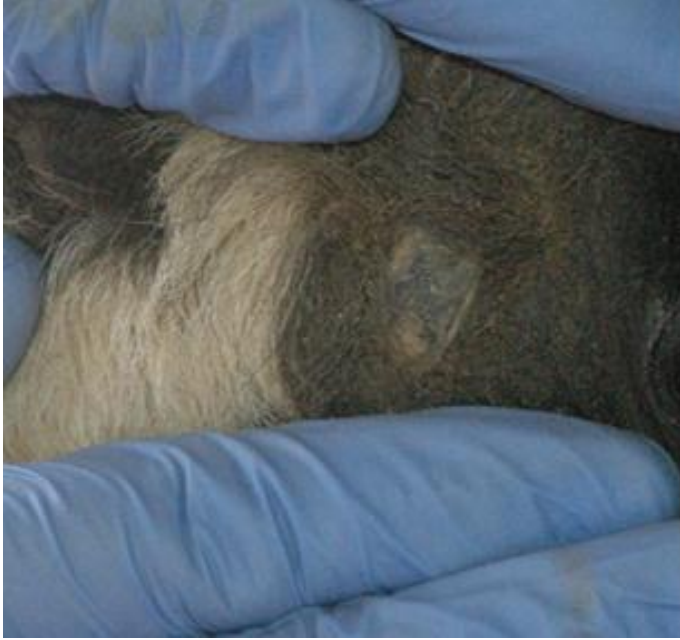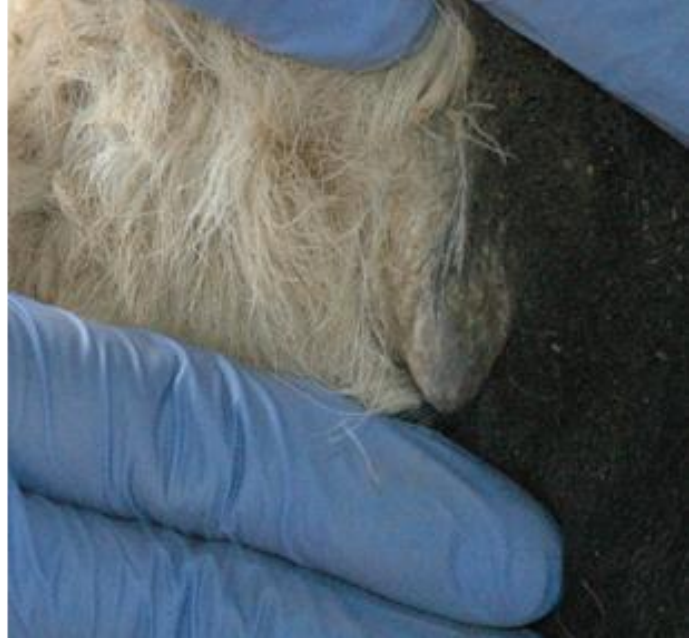

### Supplementary Figure 3

Pictures of scurs on two of the five male offspring of the genome-edited bull.

All five heterozygous males showed scurs of varying sizes on one or both sides. Shown are bull calves RCI.calf5 (L) and RCI.calf6 (R).

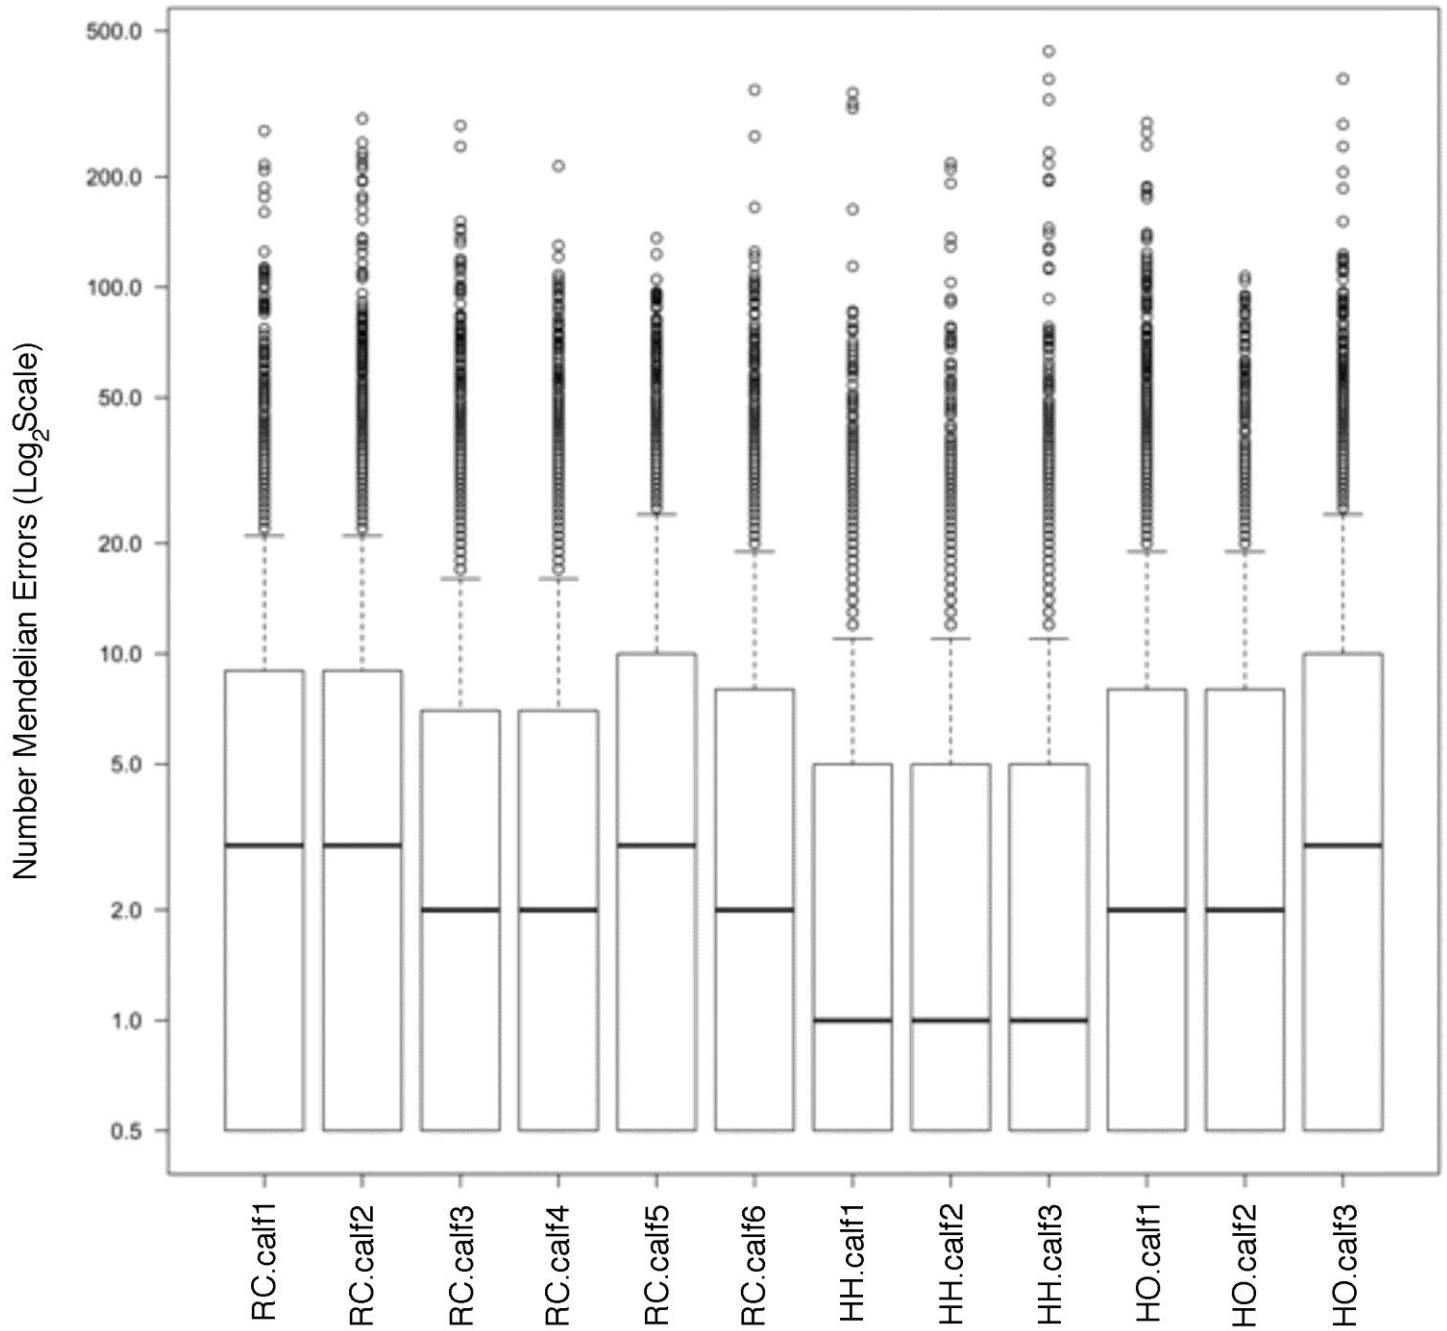

**Supplementary Figure 4**

Box plot of the number of Mendelian errors based the analysis of  $n = 12$  biologically independent sire/dam/offspring trios at 4,438 10 kb regions of the genome with a high proportion of inherited errors.

Zero errors was set to 0.5 to allow for the log<sub>2</sub> conversion. RC.calves1–6 are the offspring of the genome edited, polled bull. HH.calves1–3 are the Horned Hereford control offspring. HO1.calves1–3 are the control offspring from the Holstein bull. The figure was generated using the default parameters of the boxplot function in the package graphics version 3.5.1. Box-and-whisker plot: center line, median; bottom of box, 25% quartile (Q1); top of box, 75% quartile (Q3); whiskers,  $Q1 - 1.5 \text{ IQR}$  and  $Q3 + 1.5 \text{ IQR}$  where  $\text{IQR} = Q3 - Q1$ .

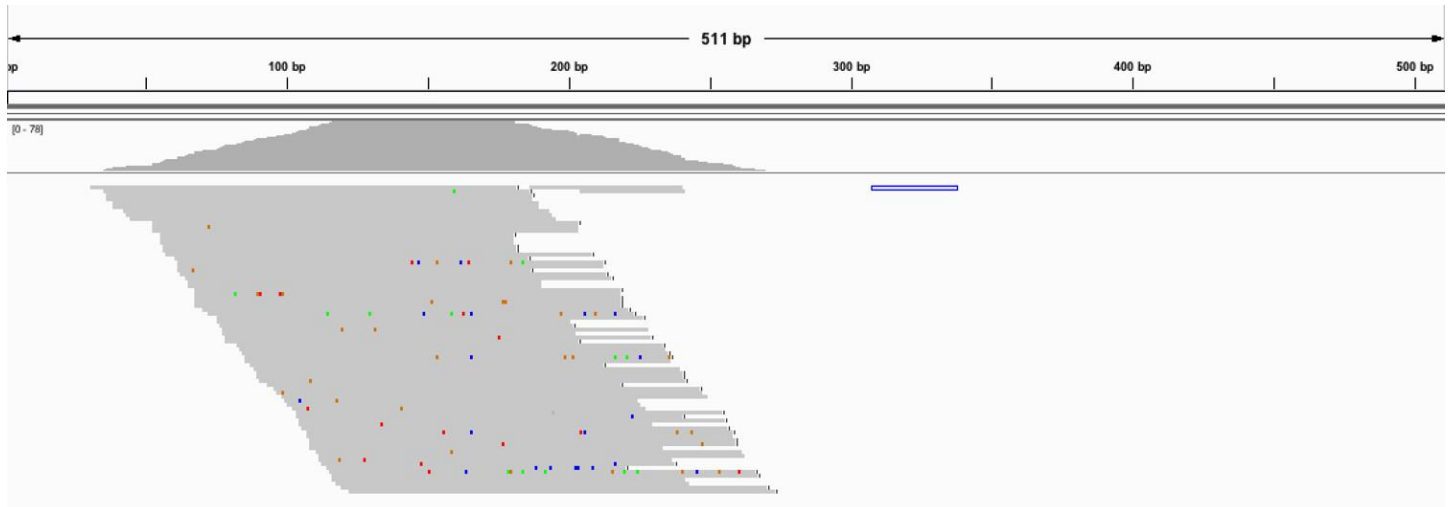

### Supplementary Figure 5

Reads from heterozygous and homozygous  $P_C$  cattle shown mapping over the junction between the two repeats in the edited ARS-UCD1.2 bovine reference genome sequence that has the insertion sequence.

Note that although there are sequence variations indicated by colored dots, there is no consistent pattern suggesting sequencing errors rather than induced mutations. One read (colored in purple) mapped unexpectedly with supplementary alignment. Revised exact alignment of the read showed it should have mapped to the insertion position but had many sequencing errors that prevented the direct alignment to the expected locus.

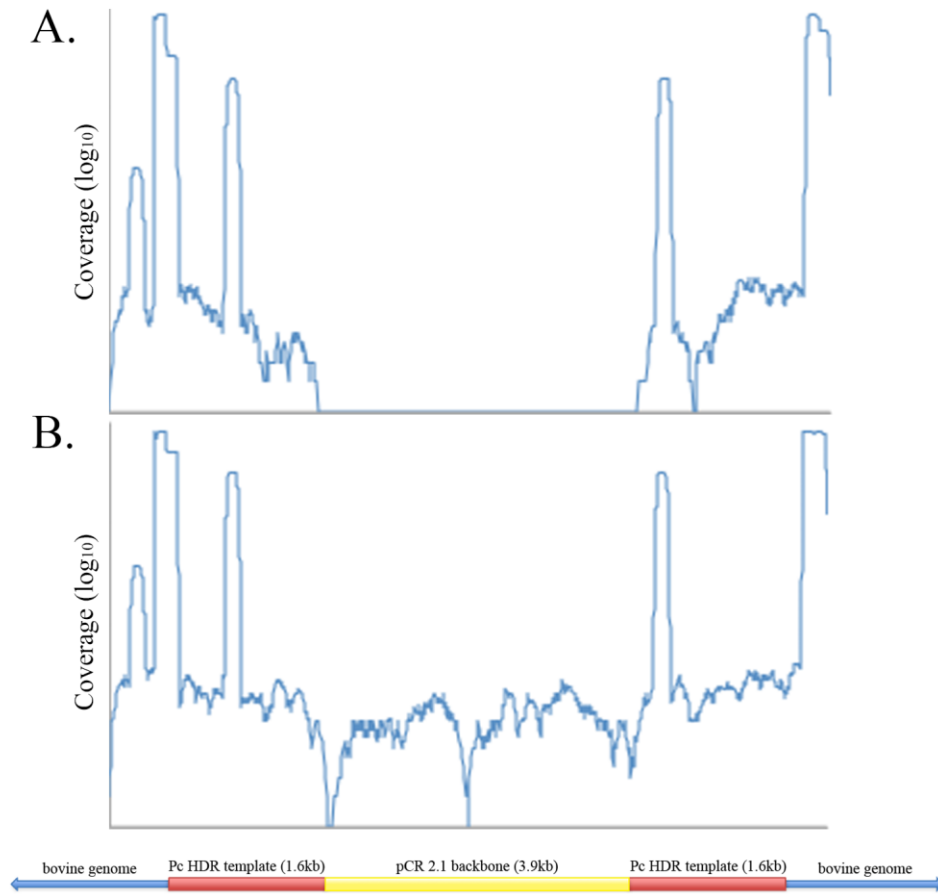

**Supplementary Figure 6**

Genomic sequence alignment to donor plasmid and Pc homology-directed repair (HDR) template.

Alignment of the short-read genomic sequences to the pCR2.1 backbone (yellow) showed A) no read coverage across the backbone (n=23), or B) the presence of the plasmid in 5 of the animals (RCI002, RC.calf1, RC.calf4, RC.calf5, RC.calf6).

**Supplementary Table 1.** The breakdown of heterozygous, compound heterozygous, and homozygous mutants for each animal as compared to the reference genome.

| Animal ID        | SNPS              |              |                       | INDELs            |              |                       |
|------------------|-------------------|--------------|-----------------------|-------------------|--------------|-----------------------|
|                  | Homozygous mutant | Heterozygous | Compound Heterozygous | Homozygous mutant | Heterozygous | Compound Heterozygous |
| RCI002           | 2157950           | 4216164      | 8632                  | 365155            | 604265       | 37652                 |
| RC.calf1         | 1531175           | 4319232      | 6507                  | 279220            | 638834       | 34557                 |
| RC.calf2         | 1680899           | 4264309      | 6662                  | 299906            | 628570       | 35125                 |
| RC.calf3         | 1683402           | 4294441      | 6810                  | 296674            | 648579       | 39573                 |
| RC.calf4         | 1681629           | 4273913      | 7304                  | 298620            | 637708       | 36807                 |
| RC.calf5         | 1617984           | 4187954      | 6579                  | 294320            | 599438       | 29155                 |
| RC.calf6         | 1676353           | 4285226      | 7150                  | 292082            | 662041       | 43138                 |
| RC.dam1          | 1472325           | 3353643      | 4527                  | 280878            | 502373       | 22829                 |
| RC.dam3          | 1544344           | 3610549      | 5258                  | 284600            | 560313       | 31609                 |
| RC.dam5          | 1492833           | 3449312      | 4872                  | 281011            | 522736       | 26616                 |
| RC.dam2          | 1616242           | 3404615      | 4786                  | 295451            | 524062       | 27161                 |
| RC.dam6          | 1584424           | 3454419      | 4830                  | 292491            | 526962       | 26744                 |
| RC.dam4          | 1582340           | 3462411      | 5222                  | 290277            | 535884       | 28026                 |
| HH.sire23        | 1512583           | 3251248      | 4552                  | 288359            | 501225       | 27045                 |
| HH.sire1         | 1550511           | 3015825      | 4250                  | 293640            | 447623       | 19979                 |
| HH.calf1         | 1563681           | 3227365      | 4571                  | 290557            | 509157       | 27760                 |
| HH.calf2         | 1817861           | 2832508      | 4174                  | 330149            | 445987       | 24168                 |
| HH.calf3         | 1505209           | 3380406      | 4990                  | 281581            | 522333       | 26847                 |
| HH.dam3          | 1545544           | 3469588      | 5009                  | 287997            | 522878       | 26055                 |
| HH.dam2          | 1596990           | 3365756      | 4378                  | 297656            | 505738       | 24570                 |
| HH.dam1          | 1551655           | 3386972      | 4914                  | 287520            | 528018       | 28751                 |
| HO1              | 2430750           | 3622040      | 7498                  | 400510            | 536095       | 34920                 |
| HO1.calf1        | 1654391           | 4314997      | 7102                  | 297972            | 635515       | 37069                 |
| HO1.calf2        | 1600163           | 4235890      | 6229                  | 293914            | 609942       | 32465                 |
| HO1.calf3        | 1661594           | 4230967      | 6723                  | 303301            | 609023       | 33200                 |
| HO1.dam1         | 1535270           | 3465764      | 4884                  | 289560            | 524889       | 26579                 |
| HO1.dam2         | 1632251           | 3272158      | 4911                  | 300734            | 514849       | 30390                 |
| HO1.dam3         | 1545873           | 3364389      | 4562                  | 293745            | 492734       | 22996                 |
| RCI001-org       | 2090428           | 4189215      | 4139                  | 339601            | 608652       | 26701                 |
| RCI002-org       | 2149642           | 4226214      | 4431                  | 348652            | 615377       | 30405                 |
| Cellline2120-org | 2087841           | 4205247      | 4261                  | 338342            | 587440       | 23506                 |
| Cellline2122-org | 2149707           | 4229252      | 4422                  | 348343            | 623220       | 31579                 |



**Supplementary Table 2.** Genomic 10kb intervals with high Mendelian error rate of more than 10 errors on average (i.e. > 1 error/kb) in all three (GH.H., H.H., and Ho.H) study groups.

| Chromosome | Chromosome position of interval [(n-1)*10000 through (n*10000)-1].                                                                                                                                                                                                                                                                                                                                                                                                                       |
|------------|------------------------------------------------------------------------------------------------------------------------------------------------------------------------------------------------------------------------------------------------------------------------------------------------------------------------------------------------------------------------------------------------------------------------------------------------------------------------------------------|
| 3          | 857, 858                                                                                                                                                                                                                                                                                                                                                                                                                                                                                 |
| 4          | 10571, 10599                                                                                                                                                                                                                                                                                                                                                                                                                                                                             |
| 5          | 402, 9921                                                                                                                                                                                                                                                                                                                                                                                                                                                                                |
| 8          | 2,3, 359                                                                                                                                                                                                                                                                                                                                                                                                                                                                                 |
| 9          | 8709, 8710, 8715, 8724, 10436, 10437, 10439                                                                                                                                                                                                                                                                                                                                                                                                                                              |
| 10         | 2284, 2318, 2337, 2369, 2371, 2497, 2498, 2503, 10021, 10265                                                                                                                                                                                                                                                                                                                                                                                                                             |
| 11         | 2654                                                                                                                                                                                                                                                                                                                                                                                                                                                                                     |
| 12         | 4491, 7007, 7010, 7025, 7031, 7053, 7079, 7093, 7115, 7117, 7118, 7124, 7126, 7127, 7130, 7134, 7136, 7138, 7143, 7172, 7173, 7174, 7175, 7176, 7177, 7181, 7182, 7208, 7213, 7214, 7217, 7219, 7220, 7222, 7223, 7224, 7226, 7227, 7228, 7229, 7230, 7231, 7232, 7233, 7234, 7235, 7236, 7237, 7238, 7240, 7241, 7242, 7243, 7244, 7245, 7246, 7258, 7259, 7260, 7261, 7262, 7263, 7264, 7265, 7266, 7268, 7269, 7270, 7271, 7276, 7279, 7280, 7281, 7282, 7283, 7284, 7285, 7286, 7288 |
| 16         | 590                                                                                                                                                                                                                                                                                                                                                                                                                                                                                      |
| 17         | 7097, 7098, 7099, 7100, 7101, 7102                                                                                                                                                                                                                                                                                                                                                                                                                                                       |
| 18         | 444, 6095, 6137, 6297, 6316                                                                                                                                                                                                                                                                                                                                                                                                                                                              |
| 20         | 3825                                                                                                                                                                                                                                                                                                                                                                                                                                                                                     |
| 22         | 1514                                                                                                                                                                                                                                                                                                                                                                                                                                                                                     |
| 23         | 2558, 2559, 2565, 2566, 2567, 2568, 2569, 2570, 2571, 2595, 2596, 2600, 2601, 2605, 2606, 2607, 2608, 2609, 2610, 2611, 2612, 2613, 2614, 2615, 2616, 2628, 2629, 2630, 2641, 2642, 2643, 2644, 2645, 2646, 2647, 2648, 2649, 2650, 2685, 2864, 2866, 2867, 2870, 2873, 2874, 2902, 2904, 2920, 2927                                                                                                                                                                                     |
| 28         | 2967                                                                                                                                                                                                                                                                                                                                                                                                                                                                                     |
| 29         | 2734                                                                                                                                                                                                                                                                                                                                                                                                                                                                                     |

**Supplementary Table 3.** GeneBank accession numbers for the 32 genomic sequences analyzed.

| Seq | Sample_id    | Sample_Title                                      | Cluster_id       | GeneBank<br>SRA Accession  | GeneBank<br>Run Accession  | Biosample<br>Accession       |
|-----|--------------|---------------------------------------------------|------------------|----------------------------|----------------------------|------------------------------|
| 30  | RCI002       | Genome edited Holstein (62.5% HO:25% MO:12.5% JE) | RCI002           | <a href="#">SRX5136390</a> | <a href="#">SRR8324591</a> | <a href="#">SAMN10598549</a> |
|     |              | Long read whole genome PromethION sequence        |                  | <a href="#">SRX5900602</a> | <a href="#">SRR9126620</a> | N/A                          |
| 2   | 1            | Genome edited Holstein x Hereford (GH.H.) calf 1  | RC.calf1         | <a href="#">SRX5136385</a> | <a href="#">SRR8324597</a> | <a href="#">SAMN10598550</a> |
| 3   | 2            | Genome edited Holstein x Hereford (GH.H.) calf 2  | RC.calf2         | <a href="#">SRX5136388</a> | <a href="#">SRR8324593</a> | <a href="#">SAMN10598551</a> |
| 4   | 3            | Genome edited Holstein x Hereford (GH.H.) calf 3  | RC.calf3         | <a href="#">SRX5136387</a> | <a href="#">SRR8324594</a> | <a href="#">SAMN10598552</a> |
| 5   | 4            | Genome edited Holstein x Hereford (GH.H.) calf 4  | RC.calf4         | <a href="#">SRX5136391</a> | <a href="#">SRR8324590</a> | <a href="#">SAMN10598553</a> |
| 6   | 5            | Genome edited Holstein x Hereford (GH.H.) calf 5  | RC.calf5         | <a href="#">SRX5136389</a> | <a href="#">SRR8324592</a> | <a href="#">SAMN10598554</a> |
| 7   | 6            | Genome edited Holstein x Hereford (GH.H.) calf 6  | RC.calf6         | <a href="#">SRX5136393</a> | <a href="#">SRR8324588</a> | <a href="#">SAMN10598555</a> |
| 8   | 156          | Hereford dam for GH.H. calf 1                     | RC.dam1          | <a href="#">SRX5136392</a> | <a href="#">SRR8324589</a> | <a href="#">SAMN10598556</a> |
| 29  | 164          | Hereford dam for GH.H. calf 3                     | RC.dam3          | <a href="#">SRX5136396</a> | <a href="#">SRR8324585</a> | <a href="#">SAMN10598557</a> |
| 31  | 255          | Hereford dam for GH.H. calf 5                     | RC.dam5          | <a href="#">SRX5136399</a> | <a href="#">SRR8324582</a> | <a href="#">SAMN10598558</a> |
| 11  | 268          | Hereford dam for GH.H. calf 2                     | RC.dam2          | <a href="#">SRX5136401</a> | <a href="#">SRR8324580</a> | <a href="#">SAMN10598559</a> |
| 12  | 942          | Hereford dam for GH.H. calf 6                     | RC.dam6          | <a href="#">SRX5136400</a> | <a href="#">SRR8324581</a> | <a href="#">SAMN10598560</a> |
| 13  | 947          | Hereford dam for GH.H. calf 4                     | RC.dam4          | <a href="#">SRX5136403</a> | <a href="#">SRR8324578</a> | <a href="#">SAMN10598561</a> |
| 21  | HH2381       | Hereford sire for H.H. calfs 2&3                  | HH.sire23        | <a href="#">SRX5136410</a> | <a href="#">SRR8324572</a> | <a href="#">SAMN10598569</a> |
| 22  | HH2981       | Hereford sire for H.H. calf 1                     | HH.sire1         | <a href="#">SRX5136408</a> | <a href="#">SRR8324573</a> | <a href="#">SAMN10598570</a> |
| 14  | E753         | Hereford x Hereford (H.H.) calf 1                 | HH.calf1         | <a href="#">SRX5136402</a> | <a href="#">SRR8324579</a> | <a href="#">SAMN10598562</a> |
| 15  | E754         | Hereford x Hereford (H.H.) calf 2                 | HH.calf2         | <a href="#">SRX5136405</a> | <a href="#">SRR8324576</a> | <a href="#">SAMN10598563</a> |
| 16  | E755         | Hereford x Hereford (H.H.) calf 3                 | HH.calf3         | <a href="#">SRX5136404</a> | <a href="#">SRR8324577</a> | <a href="#">SAMN10598564</a> |
| 17  | 254          | Hereford dam for H.H. calf 3                      | HH.dam3          | <a href="#">SRX5136407</a> | <a href="#">SRR8324574</a> | <a href="#">SAMN10598565</a> |
| 18  | 261          | Hereford dam for H.H. calf 2                      | HH.dam2          | <a href="#">SRX5136406</a> | <a href="#">SRR8324575</a> | <a href="#">SAMN10598566</a> |
| 19  | 459          | Hereford dam for H.H. calf 1                      | HH.dam1          | <a href="#">SRX5136398</a> | <a href="#">SRR8324583</a> | <a href="#">SAMN10598567</a> |
| 20  | HO1          | Holstein Sire for Ho.H. calfs 1&2&3               | HO1              | <a href="#">SRX5136395</a> | <a href="#">SRR8324586</a> | <a href="#">SAMN10598568</a> |
| 23  | 10           | Holstein x Hereford (Ho.H.) calf 1                | HO1.calf1        | <a href="#">SRX5136411</a> | <a href="#">SRR8324571</a> | <a href="#">SAMN10598571</a> |
| 24  | 11           | Holstein x Hereford (Ho.H.) calf 2                | HO1.calf2        | <a href="#">SRX5136412</a> | <a href="#">SRR8324569</a> | <a href="#">SAMN10598572</a> |
| 27  | 12           | Holstein x Hereford (Ho.H.) calf 3                | HO1.calf3        | <a href="#">SRX5136414</a> | <a href="#">SRR8324567</a> | <a href="#">SAMN10598575</a> |
| 25  | 150          | Hereford dam for Ho.H. calf 1                     | HO1.dam1         | <a href="#">SRX5136409</a> | <a href="#">SRR8324570</a> | <a href="#">SAMN10598573</a> |
| 26  | 161          | Hereford dam for Ho.H. calf 2                     | HO1.dam2         | <a href="#">SRX5136413</a> | <a href="#">SRR8324568</a> | <a href="#">SAMN10598574</a> |
| 28  | 50           | Hereford dam for Ho.H. calf 3                     | HO1.dam3         | <a href="#">SRX5136415</a> | <a href="#">SRR8324595</a> | <a href="#">SAMN10598576</a> |
| 1   | RCI001       | WGS of RCI_001                                    | RCI001-org       | <a href="#">SRX1660368</a> | <a href="#">SRR3290535</a> | <a href="#">SAMN04576207</a> |
| 2   | RCI002       | WGS of RCI_002                                    | RCI002-org       | <a href="#">SRX1660380</a> | <a href="#">SRR3290615</a> | <a href="#">SAMN04576211</a> |
| 3   | Cellline2120 | Holstein Cell line                                | Cellline2120-org | <a href="#">SRX1660381</a> | <a href="#">SRR3290631</a> | <a href="#">SAMN04576212</a> |
| 4   | Cellline2122 | Holstein Cell line                                | Cellline2122-org | <a href="#">SRX1660382</a> | <a href="#">SRR3290632</a> | <a href="#">SAMN04576214</a> |

**Supplementary Table 4. PCR primers used to amplify the pCR2.1 plasmid backbone from genomic DNA.**

| Primer | Sequence (5' – 3')   | Annealing Temperature (°C) |
|--------|----------------------|----------------------------|
| topoIF | GCCTTCTCCGAGGGACATA  | 62.3                       |
| topoIR | CAGTTGTGGGGAAGGAAAAA | 58.4                       |
| M13F   | GTAACGACGGCCAGT      | 57.2                       |
| M13R   | CAGGAAACAGCTATGAC    | 54.8                       |

**Supplementary Table 5. Primers and probes for qPCR.**

| Trait                   | Primers       | Sequence (5' – 3')          | Probe         | Sequence (5'-3')                  |
|-------------------------|---------------|-----------------------------|---------------|-----------------------------------|
| Polled                  | btPolled-213f | GCAGGCTGGAATTA<br>TGTCTGG   | btPolled-250p | FAM-<br>TGGTAGGCTGTGAAAT<br>G-MGB |
|                         | btPolled-312r | TCCAGCTGTGCGTG<br>AGCTC     |               |                                   |
| Horned                  | btHorned-213f | GCAGGCTGGAATTA<br>TGTCTGG   | btHorned-254p | FAM-<br>AGGCTGGTATTCTTG-<br>MGB   |
|                         | btHorned-333r | TCAAGGACACCTCC<br>CACACTT   |               |                                   |
| Y chromosome            | btYchr-26f    | GGACTCCACGCTTT<br>CCTATCAG  | btYchr-60p    | FAM-<br>GGTTCTCAACCAGGAA<br>A-MGB |
|                         | btYchr-102r   | GCTGTGCTATGCAG<br>CTTGAATG  |               |                                   |
| HBB – housekeeping gene | btHBB-1677f   | TGCAGGCTGACTTT<br>CAGAAGG   | btHBB-1701p   | FAM-<br>TGGCTGGTGTGGCCA-<br>MGB   |
|                         | btHBB-1744r   | AGCTTAATGATATC<br>TGTGGGCCA |               |                                   |
